# Supplementary material for: Monitoring DOM in drinking water supply systems using DOC, CODMn, UV and fluorescence measurements
Source: Royal Society of Chemistry journal article supplement (doi:10.1039/d1ew00409c), 2021-01-01
Supplement: d1ew00409c1.pdf [file d1ew00409c1.pdf]

## Supplementary data

### **Monitoring DOM in Drinking Water Supply Systems Using DOC, COD<sub>Mn</sub>, UV and Fluorescence Measurements**

Huai-Ji Wang<sup>a\*</sup>, Yan Wang<sup>b\*</sup>, Xue Han<sup>b,c</sup>, Jie Zhang<sup>d</sup>, Jun-Ling Liu<sup>a</sup>, Yu-Fan Xiang<sup>b</sup>, Meng-Xuan Zhou<sup>d</sup>, Pei-Lin Guo<sup>d</sup>, Fei Tang<sup>b</sup>, and Ai-Lin Liu<sup>b</sup>

<sup>a</sup>Wuhan Center for Disease Control and Prevention, Wuhan 430015, China.

<sup>b</sup>Key Laboratory of Environment and Health, Ministry of Education & Ministry of Environmental Protection, and State Key Laboratory of Environmental Health (Incubating), School of Public Health, Tongji Medical College, Huazhong University of Science and Technology, Wuhan 430030, China.

<sup>c</sup>School of Basic Medicine, Henan University of Chinese Medicine, Zhengzhou, 450046, PR China.

<sup>d</sup>Wuhan Water Group Company Limited, Wuhan 430015, PR China.

Corresponding author: Ai-Lin Liu ([liuailin@hust.edu.cn](mailto:liuailin@hust.edu.cn))

\* Co-first authors with equal contribution.

Table S1 Characteristics of water quality of raw water, finished water and tap water 1 in the Plant B and Plant Z drinking water supply systems (DWSS) during the study period from June 2018 to September 2019.

| Parameters                    | DWSS-B                    |       |      |                |       |      |             |       |      | DWSS-Z                    |       |      |                |       |      |             |       |      |
|-------------------------------|---------------------------|-------|------|----------------|-------|------|-------------|-------|------|---------------------------|-------|------|----------------|-------|------|-------------|-------|------|
|                               | Raw water□                |       |      | Finished water |       |      | Tap water 1 |       |      | Raw water□                |       |      | Finished water |       |      | Tap water 1 |       |      |
|                               | Range                     | Mean  | Std. | Range          | Mean  | Std. | Range       | Mean  | Std. | Range                     | Mean  | Std. | Range          | Mean  | Std. | Range       | Mean  | Std. |
| Water temperature(°C)         | 1-30                      | 18.12 | 8.85 | ND             | ND    | ND   | ND          | ND    | ND   | 3-30                      | 18.10 | 8.78 | ND             | ND    | ND   | ND          | ND    | ND   |
| Dissolved oxygen (mg/L)       | 6.74-11.50                | 8.79  | 1.67 | ND             | ND    | ND   | ND          | ND    | ND   | 6.62-11.80                | 8.84  | 1.78 | ND             | ND    | ND   | ND          | ND    | ND   |
| Total phosphorus (mg/L)       | 0.05-0.13                 | 0.09  | 0.02 | ND             | ND    | ND   | ND          | ND    | ND   | 0.08-0.13                 | 0.08  | 0.02 | ND             | ND    | ND   | ND          | ND    | ND   |
| Total nitrogen (mg/L)         | 1.41-3.22                 | 1.98  | 0.47 | ND             | ND    | ND   | ND          | ND    | ND   | 1.50-3.35                 | 2.11  | 0.59 | ND             | ND    | ND   | ND          | ND    | ND   |
| Ammonia nitrogen (mg/L)       | < 0.02 <sup>a</sup> -0.07 | 0.02  | 0.02 | ND             | ND    | ND   | ND          | ND    | ND   | < 0.02 <sup>a</sup> -0.18 | 0.06  | 0.06 | ND             | ND    | ND   | ND          | ND    | ND   |
| Nitrate nitrogen (mg/L)       | 1.36-1.81                 | 1.65  | 0.16 | 1.29-1.77      | 1.60  | 0.15 | 1.30-1.78   | 1.60  | 0.15 | 1.15-2.25                 | 1.51  | 0.28 | 1.08-2.34      | 1.44  | 0.30 | 1.15-2.34   | 1.51  | 0.30 |
| pH                            | 7.52-8.04                 | 7.78  | 0.16 | 7.39-7.74      | 7.51  | 0.10 | 7.43-7.87   | 7.54  | 0.11 | 7.61-8.01                 | 7.80  | 0.14 | 7.32-7.72      | 7.51  | 0.12 | 7.33-7.81   | 7.53  | 0.13 |
| Sulphate (mg/L)               | 30.80-39.70               | 34.76 | 2.95 | 28.10-37.60    | 33.00 | 2.86 | 28.10-37.60 | 33.05 | 2.69 | 30.20-45.70               | 36.46 | 4.48 | 29.60-45.00    | 37.18 | 4.72 | 30.30-44.90 | 36.98 | 4.44 |
| Chloride (mg/L)               | 10.40-20.00               | 14.78 | 2.53 | 13.20-22.70    | 17.86 | 2.61 | 13.70-22.70 | 17.87 | 2.51 | 11.10-20.40               | 15.52 | 2.46 | 12.10-25.50    | 19.16 | 3.25 | 12.10-25.50 | 19.25 | 3.37 |
| Free residual chlorine (mg/L) | ND                        | ND    | ND   | 0.93-1.14      | 1.03  | 0.07 | 0.35-0.98   | 0.73  | 0.18 | ND                        | ND    | ND   | 0.95-1.08      | 1.00  | 0.04 | 0.34-1.03   | 0.70  | 0.23 |

Notes: (1) not determined (ND); standard deviation (Std.). (2) <sup>a</sup> The limit of quantitation (LOQ) is 0.02 mg/L for ammonia nitrogen, and the concentrations below LOQ were recorded as LOQ/2 for data analysis.
